# Supplementary material for: The AtCathB3 gene, encoding a cathepsin B-like protease, is expressed during germination of Arabidopsis thaliana and transcriptionally repressed by the basic leucine zipper protein GBF1
Source: PubMed Central journal article supplement (PMC3991739; doi:10.1093/jxb/eru055), 2014-03-05
Supplement: supp_eru055_eru055_NEW_supplementary_data.pdf [file supp_eru055_eru055_NEW_supplementary_data.pdf]

**Figure S1.** Phylogenetic tree with the deduced protein sequences of the *Cathepsin B*-like genes of the Brassicaceae species: *Arabidopsis thaliana* (At), *Arabidopsis lyrata* (Al), *Capsella rubella* (Cr), *Arabis alpina* (Aa), *Eutrema salsugineum* (Es), *Brassica rapa* (Br). Bootstrapping values are indicated in the branches.

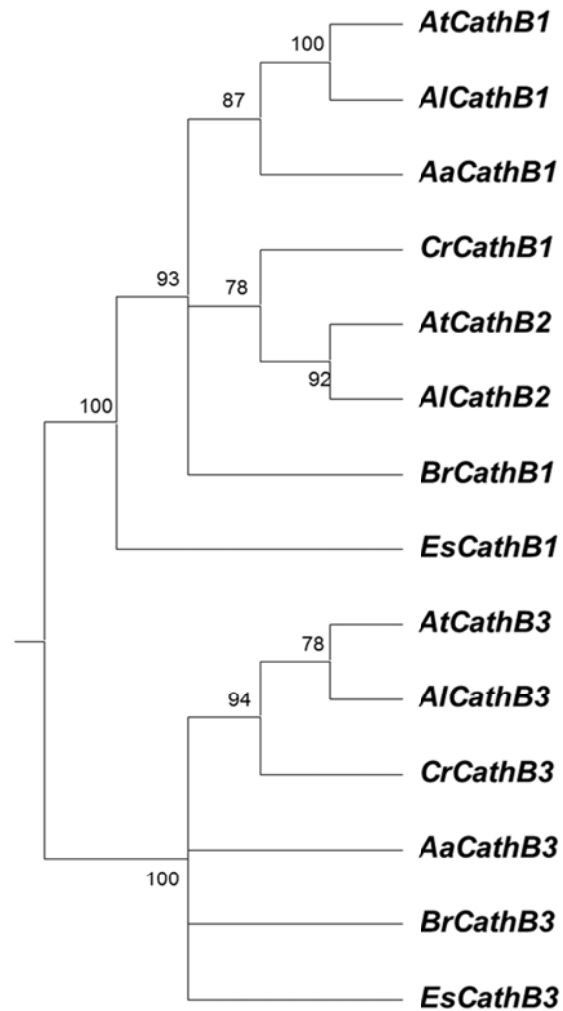

**Figure S2.** Transcription levels of the housekeeping gene (*UBC21*) used in the RT-qPCR analyses, presented as Ct mean values. The expression of the *ACT8* gene is used for comparison.

(A) Plant material from 5 week old *A.thaliana* plants: roots, rosette leaves, stems and flowers.

(B) Silique development: time intervals 1-3, 4-6, 7-9, 10-12, 13-15 and more than 15 days after pollination (dap).

(C) Seed Germination: 0 (dry seeds), 6, 12, 18, 24, 36 and 48 h.

Data are means  $\pm$  standard error (SE) of three independent experiments.

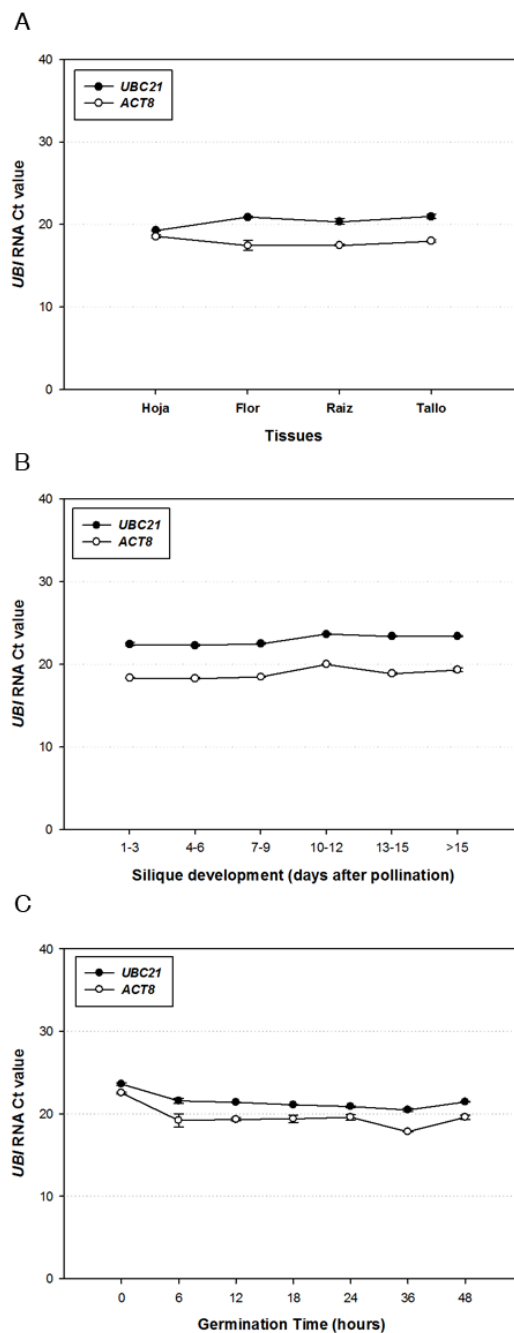

**Figure S3.** *Arabidopsis thaliana* bZIP transcription factors of the G subfamily.

(A) Phylogenetic tree and schematic distribution of conserved amino acid motives among the deduced protein sequences of the bZIP belonging to the G-subfamily.

(B) Sequences of conserved amino acids motives (MEME; Bailey *et al.*, 2009) of the bZIPs described in (A).

(C) Heat-map representing the expression levels of the G family of bZIP during seed germination (<http://www.genevestigator.com/gv/>).

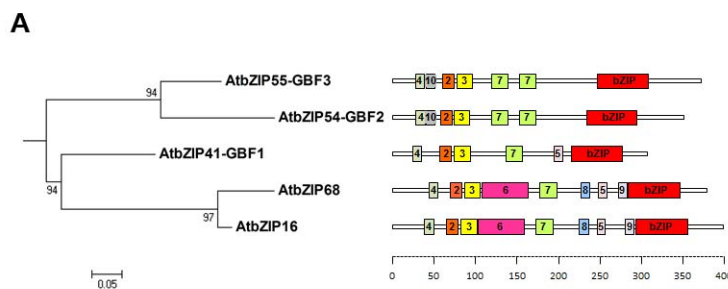

**B**

| Motif | E-value  | Consensus sequences                                                                                                                                                                                          |
|-------|----------|--------------------------------------------------------------------------------------------------------------------------------------------------------------------------------------------------------------|
| 1     | 5.2E-097 | [DN][ED][RK][E][LV][KR][QE][RK]RKQSNRESARRSLRKLKQAE[CT][ED][EQ][L][ACS][Q][RV][RK][VA][ED][AVS][L][NST][V][AEGN]EN[MQST][SAN]LR[ASD][EK][L][L][NGQ][KQR][L][KNS][SEN][EQK][CSY][ED][KE][L][RKLT][AGLST][EA]N |
| 2     | 1.1E-021 | P[HP]PYMW[GAN][VAPS][QP][HS][MHP][M][MPS][P][A][VP][GY]                                                                                                                                                      |
| 3     | 3.5E-017 | [PY][YA][PVA][APT][MFY][YCP][PH][PG]G[G[A][VM]Y]AHP[SG][MILV][PQ][MP]                                                                                                                                        |
| 4     | 3.8E-012 | [VYA][THPY][PDHQ][DW][WQ][ASN][AGS][MF]QAY[YS]                                                                                                                                                               |
| 5     | 1.8E-009 | *TNLNGMD[VL]W                                                                                                                                                                                                |
| 6     | 2.4E-006 | YPSPYAMPSPNGM[AT]E[AV]SGNT[GT][GS][G][V][T][D]E[GD][AG][K][PQ][S][D]E[G][V]KEKLP[KRS][KR]GSLGSLNMI[IT]GKNN[AP]GKN                                                                                            |
| 7     | 4.3E-004 | [D][DG][SAT][PS][A]DET[GKN][S][DAT][G][A]N[S][T][DQ][N][H][DG][SF][L][G][M][KS][KGR][LH][L][KDN][E][G][FK]D[G][A][EL][AT][AM][S][E][L]                                                                       |
| 8     | 1.1E+001 | [I][N][LPV][NS]QTV[AP]IM                                                                                                                                                                                     |
| 9     | 1.1E+002 | DG[GS][HQ]SQPWLQ                                                                                                                                                                                             |
| 10    | 1.6E+002 | PRV[AG][I][M]P[PQ]YYN                                                                                                                                                                                        |

\*Motif 1 spans the putative bZIP domain

**C**

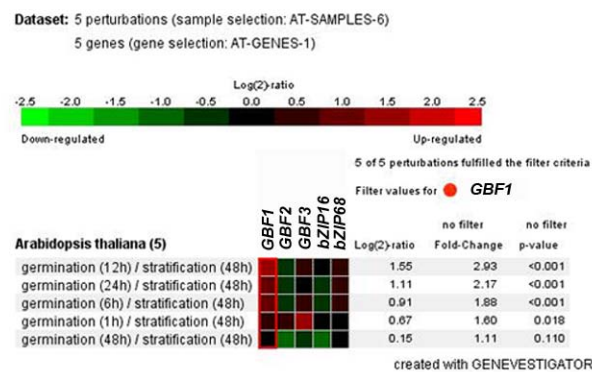

**Table S1.** List of primers used for cloning, for probe synthesis in FISH and for T-DNA genotyping of mutant insertion lines.

| <b>PRIMER NAME</b>                                              | <b>LOCUS</b>                            | <b>SEQUENCES 5' -3'</b>              |
|-----------------------------------------------------------------|-----------------------------------------|--------------------------------------|
| <b>Cloning primers</b>                                          |                                         |                                      |
| <i>S-PAAtCathB3</i>                                             | <i>At4g01610</i>                        | AAAAAAGCAGGCTTCCGAAGACTATTTTGATC     |
| <i>AS-PAAtCathB3</i>                                            | <i>At4g01610</i>                        | CAAGAAAGCTGGGT CAGCCAGAAAACAGA       |
| <i>S-PAAtCathB.SE-YIH</i>                                       | <i>At4g01610</i>                        | AGCCCGGGTAATGACGCAACGTG              |
| <i>AS-PAAtCathB.SE-YIH</i>                                      | <i>At4g01610</i>                        | AGTCTAGAAAAGAAGATCTTAGCC             |
| <i>AS-PAAtCathB-SEm-YIH</i>                                     | <i>At4g01610</i>                        | AGCCCGGGTAATGACGCAACTGTGCAATCATGTATA |
| <i>attB1</i>                                                    | <i>GATEWAY</i>                          | GGGGACAAGTTTGTACAAAAAAGCAGGCTTC      |
| <i>attB2</i>                                                    | <i>GATEWAY</i>                          | GGGGACCACTTTGTACAAGAAAGCTGGGTC       |
| <b>Fluorescence <i>in situ</i> hybridization (FISH) primers</b> |                                         |                                      |
| <i>S-AtCathB3-IH</i>                                            | <i>At4g01610</i>                        | TCTAGAGGTTCTGAATGATCTTCCGGT          |
| <i>AS-AtCathB3-IH</i>                                           | <i>At4g01610</i>                        | GGATCCCGGGTGATCAAAAGACGAAT           |
| <i>S-GBF1-IH</i>                                                | <i>At4g36730</i>                        | AGAAGCTTAATGTGATAAGCTCAAGTCT         |
| <i>AS-GBF1-IH</i>                                               | <i>At4g36730</i>                        | CTCCATCCAGCTTCTACAGTCTTGTAGG         |
| <b>Genotyping primers</b>                                       |                                         |                                      |
| <i>LP-AtCathB3</i>                                              | <i>At4g01610</i>                        | TTGTGTGTGTGTGTTGACTGC                |
| <i>RP-AtCathB3</i>                                              | <i>At4g01610</i>                        | AAAACCTTACATCACCCAGCC                |
| <i>LP-GBF1</i>                                                  | <i>At4g36730</i>                        | TCAGAATCCGATTCCAATCAC                |
| <i>RP-GBF1</i>                                                  | <i>At4g36730</i>                        | ATGAGAATGCCAATCAACAGG                |
| <i>LBb1.3</i>                                                   | <i>LB of the TDNA<br/>in SALK lines</i> | ATTTTGCCGATTTTCGGAAC                 |

**Table S2.** Major characteristics of Brassicaceae predicted Cathepsin B-like proteins\*.

| <b>Protein name</b> | <b>Locus</b>           | <b>Protein size (aa)</b> | <b>pI</b> | <b>Mw(Da)</b> | <b>Peptidase C1A Propeptide<sup>1</sup></b> | <b>Peptidase C1A papain C-terminal<sup>1</sup></b> | <b>Cysteine active site<sup>1</sup></b> |
|---------------------|------------------------|--------------------------|-----------|---------------|---------------------------------------------|----------------------------------------------------|-----------------------------------------|
| <b>AaCathB1</b>     | <i>Contig13570</i>     | 350                      | 6.54      | 38901.23      | 45-87                                       | 105-328                                            | 127-138                                 |
| <b>AaCathB3</b>     | <i>Contig16048</i>     | 357                      | 6.09      | 39435.92      | 45-87                                       | 105-339                                            | 127-138                                 |
| <b>AlCathB1</b>     | <i>918880</i>          | 359                      | 6.27      | 39629.19      | 43-85                                       | 103-337                                            | 125-136                                 |
| <b>AlCathB2</b>     | <i>918881</i>          | 360                      | 6.66      | 39892.41      | 44-86                                       | 104-338                                            | 126-137                                 |
| <b>AlCathB3</b>     | <i>490415</i>          | 359                      | 6.27      | 39409.72      | 45-85                                       | 103-337                                            | 125-136                                 |
| <b>AtCathB1</b>     | <i>At1g02300</i>       | 379                      | 6.80      | 42260.18      | 43-85                                       | 103-358                                            | NA                                      |
| <b>AtCathB2</b>     | <i>At1g02305</i>       | 362                      | 6.48      | 40030.51      | 46-88                                       | 106-340                                            | 128-139                                 |
| <b>AtCathB3</b>     | <i>At4g01610</i>       | 359                      | 5.79      | 39414.68      | 43-85                                       | 103-337                                            | 125-136                                 |
| <b>BrCathB1</b>     | <i>Bra030498</i>       | 357                      | 6.55      | 39501.72      | 41-83                                       | 101-335                                            | 123-134                                 |
| <b>BrCathB3</b>     | <i>Bra036321</i>       | 358                      | 5.65      | 39060.43      | 42-84                                       | 102-335                                            | 124-135                                 |
| <b>CrCathB1</b>     | <i>Carubv10009537m</i> | 360                      | 7.26      | 39693.32      | 44-86                                       | 104-338                                            | 126-137                                 |
| <b>CrCathB3</b>     | <i>Carubv10001253m</i> | 359                      | 6.09      | 39299.70      | 43-85                                       | 103-337                                            | NA                                      |
| <b>EsCathB1</b>     | <i>Thhalv10008009m</i> | 360                      | 7.20      | 39938.23      | 44-86                                       | 104-338                                            | 126-137                                 |
| <b>EsCathB3</b>     | <i>Thhalv10028753m</i> | 362                      | 5.66      | 39793.07      | 46-88                                       | 106-340                                            | 128-139                                 |

\*From the Phytosome database, three non-redundant Cath B-like deduced protein sequences from *Arabidopsis thaliana* (*At*) and *Arabidopsis lyrata* (*Al*), and two from *Brassica rapa* (*Br*), *Capsella rubella* (*Cr*), *Eutrema salsugineum* (*Eh*) have been compiled. Two putative orthologous genes present in the *Arabis alpina* (*Aa*) genome has been also included in these analysis. aa: amino acid number; pI: isoelectric point; Mw: Molecular weight; <sup>(1)</sup>: amino acid position.

**Table S3.** Genomic Sequences of the CathB3 gene promoters of the Brassicaceae species: *Arabidopsis thaliana* (At), *Arabidopsis lyrata* (Al), *Capsella rubella* (Cr), *Arabis alpina* (Aa), *Eutrema salsugineum* (Es), *Brassica rapa* (Br), used in the phylogenetic shadowing analysis. The sequences shown span from -1000 bp upstream from the ATG codon to the end of the first exon of the CathB3 gene (red bold). Underlined letters: promoter sequences for CathB3 genes; red letters: translated regions; blue letters: untranslated regions; black letters: non-coding sequences

>*AtCathB3* Chr4:693,695..694,934

GAGAGTGTTC AACGAGAGTTTGGTGTTTTAGCTGTAGAGAACTTTTAGATTC  
GTTTGTGCTACATATCGACTACTTCGGGACCAGTGACCGGAGTGATATACAT  
TTCCAACAGAAGAATCGCTTTTTGTAGCGACTATGCCATTCGTCTTCCTTCTTCT  
GCCGGTGGAAACGGTGTTCGCGCATATTACAAGGTTAGACCATGAGTTTCAA  
CAATATTTTTGTAAATAGAAGTTTGGTTCATACTTAAAAAAAAAAGATCTAAGTT  
GGTATTGGTAACAAGAATTGAATTGTTCTTTGTGAAATAGCTGTTTTCATTTTGT  
AAAATAAGAAAATAATAATTTGGTTTCTAAAGATTAGTGACTATATAATATATT  
GAGCAATAATAAAATTTATATGTGATATTGTATTATAATGTTGTATATTGATAG  
GTGGTGTGAGTGGGAGAAGATAAGTAGCATTAGTTCATCAACGAACGTGTT  
GAAGCCAAGTGAGAGATACGTGCATATGGTGACACGAGATGGGTTTGAGTTTT  
GGTTCATGGGCTTTGTCTCTACATCGATGCTTTCAATTGTCTCAACAAAGCTCT  
CCTCAATTCCCGTTGTAATCATGCCATGTAATCAAATTCTAATTTTCTTATCAAA  
ACTACGAAGACTATTTTGATCAGATCTCATAAAATATCAAAAAAAAAAATTAC  
AAGTTTACCACCAAATTTATCTGATTCATAACTTTGACCAACCAAAAAAA  
TACAAAATTGGGATAACTGAGTTACACAGGTAACCTATTGATGCTTGTTAAATT  
GTCATTGCGATTCGTAACAAAGGGTCCAATCCCAATAAAAAAATTACG  
AACGATGTGTAATGACTAATGACGCAACGTGGCAATCATGTATACCTTCAACG  
GCCTAGAATTCTGTAGATTGCATCAATCAACGGCTAAGATCTTCTTTTGGCTCT  
TAACAAAGTCATTGGCTGATTCAGTTTCCC AAGAAATGTCTCTGTCATTGTGCA  
GTAGATAAGCCACTCTCTCTCTCTTTTCTCTCTTTTGGCTATTATAAAGAAAAAGA  
TTCATTCTCCACCATTGAGGTTAACTTATACAAACAGATCTTTTGGAAATTGG  
ATTCATCTAAGAAGCAGACTCTGTTTTCATGGCTGTTTACAATACCAAACCTCTG  
TTTGGCCTCTGTTTTCTTGCTCTTAGGGCTTCTCTTGGCTTTGACTTGAAG

>*AlCathB3* scaffold\_6:24,227,748..24,228,962

GCTCAATTTTTGATCTAATTATATACTCATTTCGATTTGACTTGACCCGATCTAA  
TTCTATTACCCATTCGATATGGACTTGTCCCTCGATCTAATTCTATTACCTAGTCG  
ATCTGAACTTGTCCCTCGATCTAATTCTATTCCAGTTGTCCCCGAGTAAATCCAG  
ATCTCTGGCGGGCAAACTACACCATCTGGCGATGGACAGTCAAGAGAATTGG  
ATGATAAAAATCATCACGCTTAATTTTTGATCTAATTATATACTCATTTCGATTT  
GACTTGTCACCGATCTAATTCTATACTCATTCTATCTGAACTTGTCTCCGATCT

AATTCTATTACTCATTTCGATATGAATTTGTCCCCGATCTCATTCTATTACTCATT  
CGATCCGAACATGTCCCCTCTTTTATCTGATATATTAAGAGCAATTAATGGT  
CTAACTCTACTCTATTATCATTTTTATTAATTAATCAATTATCTAGCAAATGT  
AAATGTGCAGCATTATTGCAGACCTACCTGCTCCTTCTTTGGAAGCGCCGGAC  
GAACTGTCTCTGTCTCTGACACAGACTCTGTCCCAATCAGGGGTATTTGGTC  
CACAATTCCGCATGTGCTATTGAAATGTGGTAGATTTTGCAATATTCACATTCA  
TAATTTGGTCTTATAGTAAATCAACATTAACATTCGTTTTTTTTTTCCGACTAA  
ATCAACATTAACCTATAACCCAAAGAATAAAAAAAAAATTTGGGTAACCTAAGAG  
TTACAAACTTACACAAGTAACTTATCTGATCGATGGGTGTTAACTTGCCATTGA  
GATTCGTAACAAAGGGTCCAACCTCCAATCCATAAGATACTATTACGAAAGA  
TGTGTAATGAGTAATGACGCAACGTGGCAATCATGTATACCTTTAACGGCCTAG  
AATTCTGTAGATTGCACCAATCAACGGCTAAGATCTTCTTTGGCTCTTAAACA  
AGTCATTGGCTGATTCAGTTTCCCAAGAAATGTCTCTGACATTCTGCAGTAGAT  
AAGCCACTCTCTCTCTCTGAAGATTCATTCCCCACCCTGAGGTTTAACTTA  
TACAAATAGATCTTTTGGTTTTTGATTCATCGAAGAAGCAAACCTCTGTTTTCA  
ATGGCTGTTACAATACCAAACCTCTGTTTGGCCTCTGTTTTCTTGCTCTTAGGGCTT  
CTCTTGGCTTTTGAAG

>*CrCathB3* scaffold\_6:15,984,537..15,985,614

ACAATATCATTTACAAAGCATCTGAGAAAATGTCAAGAAGGGTTTCTCAATGG  
TATTTTTTGAAGTGTCTAAAACCTTATGGTGTTTTGGAACATCAAAAACCTATATCT  
TTGGCATCTTAGCCTTAGGTATTGTTTTCTAAATGCTACAAATGTTATGCTGGT  
GCTGCTGATATAGGTGGTGATGGAGTTGGAGAAGATAAGTAGCATTGTTTCAT  
CATCGAACGTGTTAAAGCCGAGTGAGAGGTATGTGCATATGGTGACACGAGAT  
GGGTTTGAAGTTTTGGTTCATGGGCTTTGTCTCCTACACCAATGCTTTCAATTGTC  
TCGACAAAGCTCACCTCAATTCCCACCACTAATGATGTCTTGTAAATCACATTCT  
AGTTGAGAATTTTATTATCACTAATAAATAATTCTTTCTTGCTAGTCATATAATA  
AGTATGTAACCTTGTAAAGAACTCTGTTGCCATGGTCTGGAATAAAACCTTTGTGAG  
TATAAAAGTGTA AAAACCCTACTCGTTAGATAAATTAGAAGTTTAGCTAGGAT  
GTATTGGTAAATCAAGAACGAAATTAATTTGACTTCTAGGATAAATTGAGCT  
ACAAAGTATGTAAACTTTAATGATTAGTGGTTGTTATTTGTTAACTTGCCGAGT  
TGGTATAGCGATTTTCGTAACAAAGGGTCCAACCTCCAATCCATAAGATATTACG  
AACGATGTGTAGTGAGTAATGACGCAACGTGGCGATCATGTATACCTCTAACG  
GCCTAAAATTCTGTAGATTGCACCAATCAACGGCTAAGATCTTCTTTTGGCTCA  
TTGGAAATAATAGTCATTGGCTGATTCAGTTTCCAAGAAATGCTGTGTCATT  
GTGCAGTAGATAAGCCACTCTCTCTCTCTCTTTTTTGGTATTATAAAGTAAAG  
GAGATTCCCCACCCTGAGGTTTTTACTTGTCCCAAAGAGATCTTTTGGTTTTG  
GATTCCTTGAAGAGCAAACCTCTGTTTTCAATGGCTGTTACAATACCAAACCTCT  
GTTTGGCCTCTGTTTTCTTGCTCTTAGGGCTCGTCTTGGCTTTTGAAGTGCAG

>*AaCathB3* contig-16048

TAAAAATTTGTTTTGACCAAAAAAAAAAAGTCTATAAAAAATTGTTTTTCTAAAT  
AATTTGTTTTGTTTGCTCTATAAATTATTGCATTTTAAACTAACAACGACATGGC  
GTGGTCGCCTTTATATAAATGGATCCACATATATGGAAAAAACGACGCGAAA  
AAAGAAGACGACATTTTGGTTGAGCTCATCCCCAAATGAAATTTGGTATATGA  
GATCAAATCATATCGTCTGTGAAAATATTTGGAAAGAAGGATTTAAACTGCT  
ATCTTTTAAATTTAATTTTTTTGTAATCAAAATTTTCAGTTTAGTTATAATCGCAT  
ATCTCTACAAAATTCAAATTTGTTTTTCAGGTTGATTGTTTTAAATCTTAAACATT  
ATTATCTATTTTTCTCATGTGGGTGAAAAATGAAATTTCACTTTTTAAACAACA  
GAACAAAAAATTGAAACAACTATAATTTACTTGGGCTATTATCCCAATTTATTA  
CTTTATCCCATAGAATCATCCATATTTTTGCATAATCCAATACATAACACAAT  
ATAATATTGCACCTTTATTAGTGGTTATGGGTCTAATGGCGATTCGTAAGAAA  
TGATCCAACTCAATCACAATACGTTAATACGACGACGTGTAATAACACAACGT  
GTCAATCATCAATAGCTTGAACGGCCTAGATTTCTGTAGCTAAAACCAATCAAC  
GGCTAAGATCTCTTTGCTCTTAAAAAACTAAATTATCATTGGCTTATTCACCTT  
CCCAAGAATTGTCTTTGTCATGCTTCACAAGATAAACCCAATCTCTCTTTCATTA  
TATAAAGGAGATTCCCATTTTAGTTGGCTTTACTTTCTACACACCAGGATCTTG  
ATTTTTCTTGAGCTTGGAGAGATTC**ATGGCTGATTCTATAACCAA**ACTCTGTTT  
**AGTCTCTGTTTTCTTGCTCTTTGGACTTGTCTTGCAGGTAAAGCTTTCT**

>*EsCathB3 scaffold\_3:693,808..695,035*

TTATAATGTATTTAAAG**GTGGTAATGGAGTTGGAAAAGGTAAGGAGCATAAGC**  
**TCATCGTCGAACGTGTTAAAGCCAAGTGAGAGGTATGTGCATGTGGTGACGCA**  
**AGATGGTTTTGAGTTTTGGTTTATGGGATTCGTCTCCTACATCGATGCTTCAAT**  
**TGTCTCAACAAAGCTCGTCTTAACTCTCATTGTGTTTCTGGCATGTAAACCAA**  
**TTCTAAGACTTTTCTTATCACTAATAAGTCTTTGTTGTCTACTCATATGTACAAC**  
**TTGTATTGTAATCATTGTTGGGTTCCGCATGGTGTAGTAACAAAAGAATTGATTTA**  
**CACAAAAGTAACCTGTTTACGGTCGTTATTAGAGATGAGTGC**GTTATTGATAG  
AGTGAATTCTATTATCTGTTGCTATCTATTATTAACTCTCTATAATTTTAGTGG  
TAAACGTGATCCACTAGTTTCGTGTGGATCAGCACTTGTAAGAATATATGATTT  
GTTTGGTTAACTTAGTAAAATAATTA  
AAAAGTACTAGAAAAAA  
AAAAACTCACA  
AAGAATTTGCAATATTCGTAGAGAGCTTTTTTTCTTCTTCTTAATTTACACCTTT  
TAACATACTTTCTTATTTTGATAATAAAGAGTCTGATGAATACAACAAATTCAG  
GAAATTAGTATCTAAATCTAATAATTAAAAAATTTATATAGATACATGTATAAGA  
GTGAATCATCATATATTAGTTGCTTGCTCCATAAAATTACAATTATCTGAAATT  
TCCGCATAAATTCAAAATAGATAACAACTGATATTTTACCTTTAGTGGTTATG  
GCGATTTCGTAATGAAGGGTCTAACTCTAATCGGACGACGTGTAATGGTTCAAC  
GTGGCGATCATGTATAGCTTGAACCGCCTAGTTTTTCGTAGATGAGAACCAATC  
AACGGCTAAGATCTCATTCCCAACTCTCTTGGCTCTTTAAAAAAGTCATTGG  
CTCATTCAGTTTCCCAAGAAGTGTCTCT**GTGCATTGTGCAGTAGATAAGCCACTC**  
**TCTCTCTATATTATAAACGAGATTCTCCATTAGTGAGGTTACTTCAACAAAGA**



GATCTTTTGATTTTCTGGGATTCATCGAGAAGAGTTTGAAAGTGAAAAAGAGA  
GATCCCA**ATGGCTGATTCTACCACCACCACCAA**ACTCTGTTTGGTCTCTGTTTC  
TTACTCTTAGGGCTTGTCTCCTCGTCTTTCGACTTGCAG

>*BrCathB3* A09:560,816..561,890

CGAGATGTAAAAAATAGTTTGGGCCGCAATATGTTATAAGCAGTTAGAGAAA  
ATCTTATTGGATGAGTAAAGTCCAGTGTATGTTGATCGAAACAAACATCAAGTC  
TAAAGTAAAATGAAGCATATAATACTGAGCAACAAAACACGTGTTGTATACT  
TAAATTTTAATATGTGCAGAGACTTTTATAATTATTATTCGTTAACCTTAATTTT  
TCATACTTCCTCAGGGCTTGAGTTTACTTTCTGGCCACATGAATTTCTGGAAGA  
CTAACCCATAAATTTAATTGGGCTCGGATATATGTTGCAATAGTTTATTTTTGG  
GCTGGAGAATATGCTAGATGACATGTCATATTGATTGGTCCTGAATATTTTAGG  
TGAAGTGGACACTCTTAGAAGCCACAAAATTAGTTACTTTTATATAGTAGGATG  
ATGAATACAAATTACGAAAATATGCATACAAATTTTTCTTTTTGTCGAAAATT  
TGCATCAGTTTAAGATGATGATTTTTTTTTTTTGTCAAAAATGATGAATACAAAT  
TATTATTTCAATACTAGTTGTATTATTTACTTGCTCCGTAAAATTACAAAAT  
AACCAGAATTTTCCGCATTA AAAATCAACAAAATGGAACCAATATTAATCTA  
CCACTAGTGGTTTATGCGGATTTTCGTGACGAAGAGTCCAACATCCAAATACGA  
CGACGTGTAAA ACTCTAAATGACGCAACGTGTCCATCATGTATACCTCGAGAA  
CGCCTAGTTTTCCGTAGATGAGAACCAATCAACGGCTAAGATCTCAATCACTT  
TCCAAGAAAATCTCTGTCATTTCTTCAGTAGATAAGCCACTCTCTCTCTCTCT  
CTCTCTCTCTCTATCTCAATTATAAAGAAAAAAGATTCTCCCATTACTGAG  
GTTGCGTCCATTACAAGATCTTTTAGAGTTCTCTGAGATTCATCGACTTGAGAA  
AGTGTGAAAAGGAGAAGAGATTCCAAAACC**ATGGCTGCTGATTCTACAACCAA**  
**ACTCTGTTTGGTCTCTGTTGTCTTGGCTTTAGGCCTTGTCTCCTCCTTGCAG**

**Table S4.** Characteristics and sequences of the primers used in the RTqPCR analysis.

| <b>RTpPCR primers</b> |                         |                  |                              |                                            |
|-----------------------|-------------------------|------------------|------------------------------|--------------------------------------------|
| <b>PRIMER NAME</b>    | <b>SEQUENCES 5' -3'</b> | <b>LOCUS</b>     | <b>PRIMER EFFICIENCY(%)</b>  | <b>AMPLICON DISSOCIATION T<sup>a</sup></b> |
| <i>S-CathB1-RT</i>    | AGTACCACGGTGTAGTAACC    | <i>At1g02300</i> | 90.05%                       | 74.9°C                                     |
| <i>AS-CathB1-RT</i>   | GATTGATTCTGTATGCGCCG    |                  |                              |                                            |
| <i>S-CathB2-RT</i>    | CACCACGGTGTAGTCACTG     | <i>At1g02305</i> | 92.63%                       | 75.7°C                                     |
| <i>AS-CathB2-RT</i>   | GACCTTGTACGCACTA        |                  |                              |                                            |
| <i>S-CathB3-RT</i>    | CCGGTTGCATCGGTTTAAG     | <i>At4g01610</i> | 93.15%                       | 71.8°C                                     |
| <i>AS-CathB3-RT</i>   | GTCACCGGAATCTTTTACTGG   |                  |                              |                                            |
| <i>AS-GBF1-RT</i>     | GCAGGCCGAATGCGAACAAC    | <i>At4g36730</i> | 99.30%                       | 75.1°C                                     |
| <i>S-GBF1-RT</i>      | AGCTACAGCCTCTGCTCCAA    |                  |                              |                                            |
| <i>S-UBC21-RT</i>     | GCTCTTATCAAAGGACCTTCGG  | <i>At5g25760</i> | 95.80%                       | 76.3°C                                     |
| <i>AS-UBC21-RT</i>    | CGAACTTGAGGAGGTTGCAAAG  |                  |                              |                                            |
| <i>S-ACT8-RT</i>      | GGTCGTACAACCGGTATTGT    | <i>At1g49240</i> | Graeber <i>et al.</i> , 2011 |                                            |
| <i>AS-ACT8-RT</i>     | GAAGAGCATACCCCTCGTA     |                  |                              |                                            |
